# Supplementary material for: Forskolin Sensitizes Human Acute Myeloid Leukemia Cells to H3K27me2/3 Demethylases GSKJ4 Inhibitor via Protein Kinase A
Source: Front Pharmacol. 2018 Jul 20;9:792. doi: 10.3389/fphar.2018.00792 (PMC6063003; doi:10.3389/fphar.2018.00792)
Supplement: Supplementary file 3 [file Data_Sheet_1.ZIP]

Archive with 4 entries (4 files):
- 382492 _supp images/bcl 2_21.02.jpg
- 382492 _supp images/caspase3 15.02.jpg
- 382492 _supp images/erk 15.02.jpg
- 382492 _supp images/parp 15.02.jpg
